# Supplementary material for: Sb3+–doped 0D Cs3GdCl6 microcrystals with a near-unity photoluminescence quantum yield and high thermal quenching resistance for light-emitting application
Source: Royal Society of Chemistry journal article supplement (doi:10.1039/d4tc00354c), 2024-01-01
Supplement: d4tc00354c1.pdf [file d4tc00354c1.pdf]

## Supporting Information

### **Sb<sup>3+</sup>-doped 0D Cs<sub>3</sub>GdCl<sub>6</sub> microcrystals with a near-unity photoluminescence quantum yield and high thermal quenching resistance for light-emitting application**

Xiantian Liang,<sup>‡a,b</sup> Wei Zhang,<sup>‡a,c</sup> Yitong Shi,<sup>a,b</sup> Wen Zhang,<sup>a</sup> Hongyi Yang,<sup>a</sup> Ping Huang,<sup>a,b</sup> Lingyun Li,<sup>c</sup> Qi Zhang,<sup>c</sup> Wei Zheng<sup>\*a,b</sup> and Xueyuan Chen<sup>a,b</sup>

---

a. CAS Key Laboratory of Design and Assembly of Functional Nanostructures, Fujian Key Laboratory of Nanomaterials, and State Key Laboratory of Structural Chemistry, Fujian Institute of Research on the Structure of Matter, Chinese Academy of Sciences, Fuzhou, Fujian 350002, China.

E-mail: zhengwei@fjirsm.ac.cn

b. College of Physics and Energy, Fujian Normal University, Fuzhou, Fujian 350117, China.

c. Key Laboratory of Advanced Materials Technologies and International (Hongkong, Macao and Taiwan) Joint Laboratory on Advanced Materials Technologies, College of Materials Science and Engineering, Fuzhou University, Fuzhou, Fujian 350108, China.

<sup>‡</sup> Xiantian Liang and Wei Zhang contributed equally to this article.

**Table S1.** Crystal structure parameters of Cs<sub>3</sub>GdCl<sub>6</sub>.

| Formula                                            | Cs <sub>3</sub> GdCl <sub>6</sub> |
|----------------------------------------------------|-----------------------------------|
| Temperature (K)                                    | 293                               |
| M <sub>r</sub>                                     | 768.68                            |
| Crystal system                                     | orthorhombic                      |
| Space group                                        | <i>Pbcm</i>                       |
| <i>a</i> (Å)                                       | 8.2273 (2)                        |
| <i>b</i> (Å)                                       | 13.1409 (4)                       |
| <i>c</i> (Å)                                       | 26.5472(7)                        |
| $\alpha$ (deg)                                     | 90                                |
| $\beta$ (deg)                                      | 90                                |
| $\gamma$ (deg)                                     | 90                                |
| <i>V</i> (Å <sup>3</sup> )                         | 2870.13(14)                       |
| <i>Z</i>                                           | 8                                 |
| $\rho_{calc}$ (g cm <sup>-3</sup> )                | 3.558                             |
| <i>F</i> (000)                                     | 2648.0                            |
| GOF on <i>F</i> <sup>2</sup>                       | 1.053                             |
| <i>R</i> <sub>1</sub> [ <i>I</i> > 2σ( <i>I</i> )] | 0.0324                            |
| <i>wR</i> <sub>2</sub> (all data)                  | 0.0835                            |

**Table S2.** Nominal and actual doping concentrations of  $\text{Sb}^{3+}$  in  $\text{Cs}_3\text{GdCl}_6: x\%\text{Sb}^{3+}$  microcrystals (MCs) synthesized with different molar ratios of Sb to Gd in the precursor solution. The nominal  $\text{Sb}^{3+}$  doping concentration was defined by the molar ratio of Sb to (Gd + Sb) in the precursor solution, and the actual  $\text{Sb}^{3+}$  doping concentrations were identified by inductively coupled plasma-atomic emission spectroscopy (ICP-AES) .

| Sample | Nominal                         | Actual                          |
|--------|---------------------------------|---------------------------------|
|        | $\text{Sb}^{3+} / \text{mol}\%$ | $\text{Sb}^{3+} / \text{mol}\%$ |
| 1      | 0                               | 0                               |
| 2      | 0.1                             | 0.1                             |
| 3      | 0.5                             | 0.5                             |
| 4      | 0.9                             | 1.0                             |
| 5      | 1.0                             | 1.2                             |
| 6      | 1.5                             | 1.7                             |
| 7      | 3.0                             | 3.3                             |
| 8      | 5.0                             | 3.4                             |

**Table S3.** Photoluminescence (PL) parameters of Cs<sub>3</sub>GdCl<sub>6</sub>: x%Sb<sup>3+</sup> MCs with different Sb<sup>3+</sup> concentrations upon ultraviolet (UV) excitation at 330 nm: PL lifetime ( $\tau$ ), PL quantum yield (QY), absorption efficiency (AE), and external quantum efficiency (EQE). The PL lifetimes were determined by single-exponential fitting to the PL decay curves of the MCs.

| Sb <sup>3+</sup> / mol% | $\tau$ / $\mu$ s | PLQY / % | AE / % | EQE / % |
|-------------------------|------------------|----------|--------|---------|
| 0.1                     | 3.15             | 52.0     | 43.7   | 42.1    |
| 0.5                     | 2.98             | 71.7     | 60.3   | 58.1    |
| 1.0                     | 2.96             | 96.3     | 81.0   | 78.1    |
| 1.2                     | 3.10             | 85.4     | 71.8   | 69.2    |
| 1.7                     | 2.82             | 72.2     | 60.7   | 58.5    |
| 3.3                     | 2.89             | 60.0     | 57.5   | 48.6    |
| 3.4                     | 2.78             | 57.1     | 55.0   | 46.3    |

**Table S4.** Full-width at half maximum (FWHM) and PL lifetime ( $\tau$ ) of Cs<sub>3</sub>GdCl<sub>6</sub>:1.0%Sb<sup>3+</sup> MCs measured at different temperatures under UV excitation at 330 nm.

| T / K | FWHM / meV | $\tau$ / $\mu$ s |
|-------|------------|------------------|
| 80    | 384        | 3.39             |
| 100   | 390        | 3.33             |
| 120   | 397        | 3.29             |
| 140   | 408        | 3.15             |
| 160   | 417        | 2.98             |
| 180   | 427        | 2.78             |
| 200   | 441        | 2.69             |
| 220   | 453        | 2.67             |
| 240   | 468        | 2.66             |
| 260   | 481        | 2.62             |
| 280   | 495        | 2.59             |
| 300   | 510        | 2.33             |

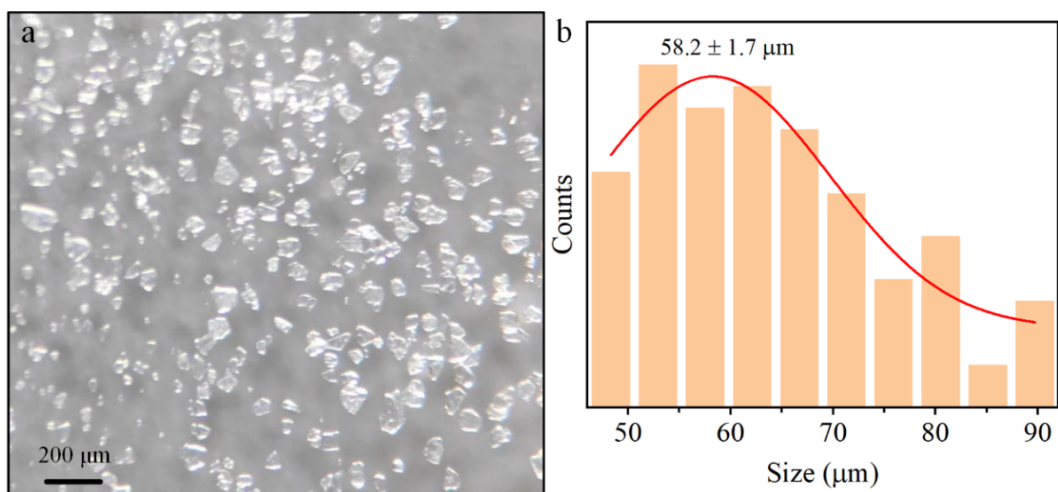

**Figure S1.** (a) Optical image under ambient light and (b) histogram of size distribution for  $\text{Cs}_3\text{GdCl}_6: 1.0\%\text{Sb}^{3+}$  MCs. The size distribution was obtained by randomly calculating 200 particles in the optical image.

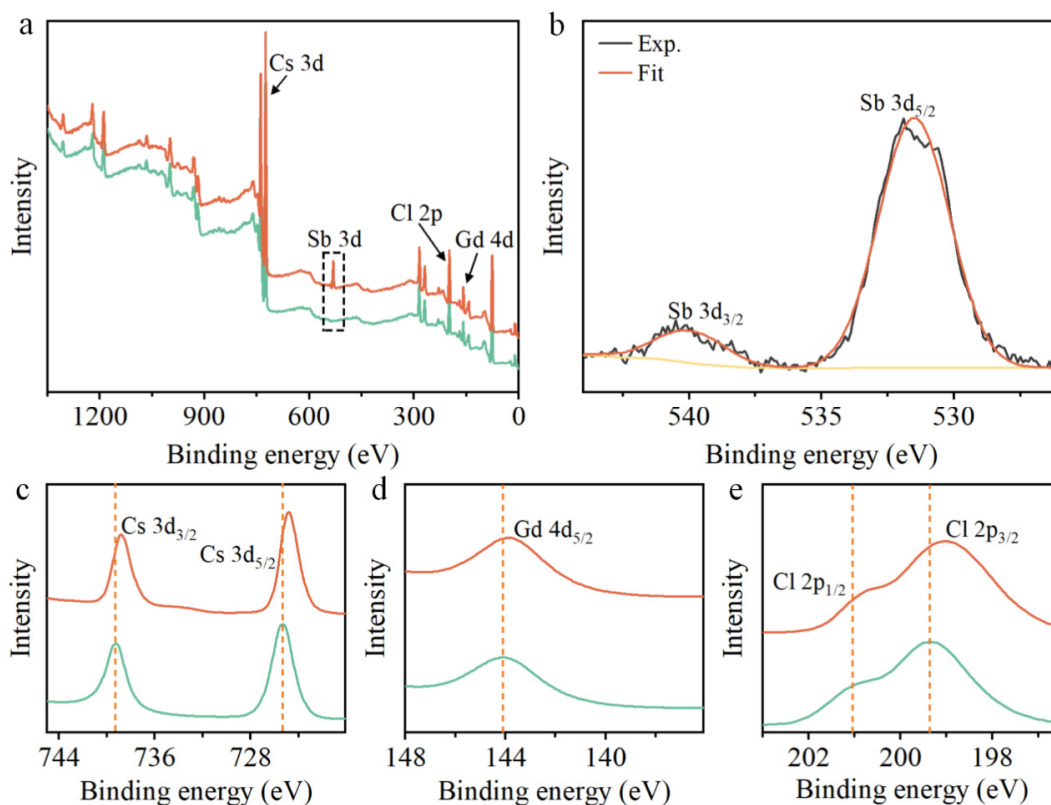

**Figure S2.** (a) X-ray photoelectron spectra (XPS) of  $\text{Cs}_3\text{GdCl}_6$  (green) and  $\text{Cs}_3\text{GdCl}_6$ : 1.0% $\text{Sb}^{3+}$  (orange) MCs. The spectra are shown over the energy regions typical for (b) Sb 3d, (c) Cs 3d, (d) Gd 4d, and (e) Cl 2p peaks. The peaks at the binding energies of 531.2 and 540.9 eV, 738.2 and 724.2 eV, 144.0 eV, 200.3 and 198.5 eV can be assigned to the  $\text{Sb}^{3+}$  3d,  $\text{Cs}^+$  3d,  $\text{Gd}^{3+}$  4d, and  $\text{Cl}^-$  2p signals, respectively. The Cl 2p and Gd 4d peaks in  $\text{Sb}^{3+}$ -doped MCs shifted towards lower energies relative to those in the undoped MCs, due to the change in the electron cloud density around  $[\text{GdCl}_6]^{3-}$  induced by the substitution of  $\text{Sb}^{3+}$  at the octahedral  $\text{Gd}^{3+}$  site.

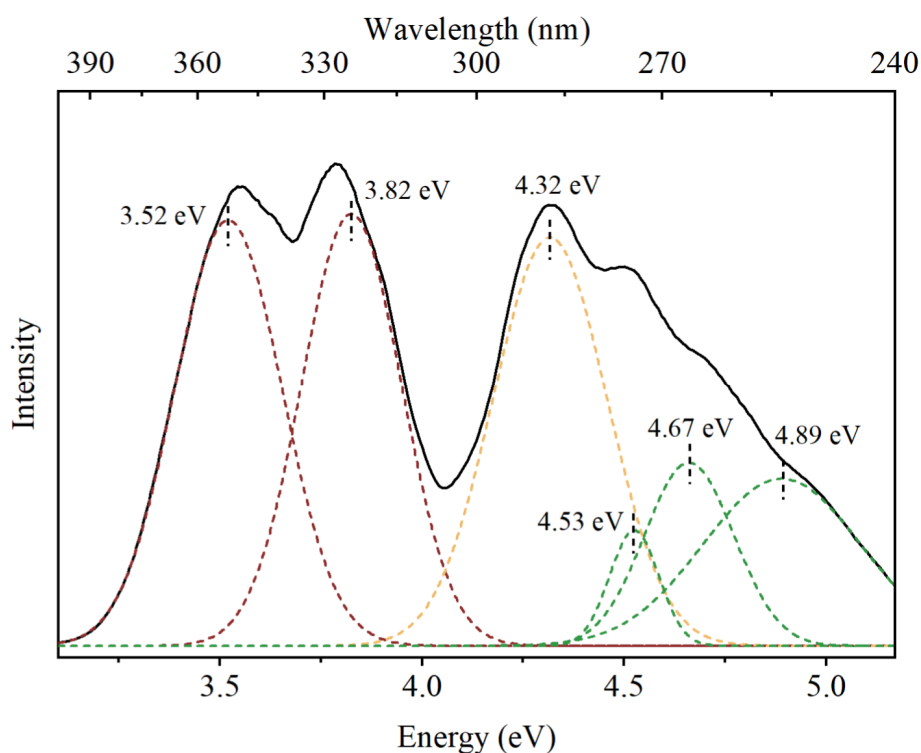

**Figure S3.** PL excitation spectrum ( $\lambda_{\text{em}} = 540 \text{ nm}$ ) of  $\text{Cs}_3\text{GdCl}_6: 1.0\%\text{Sb}^{3+}$  MCs and the corresponding Gaussian fit. The excitation spectrum was deconvoluted into six bands centered at 4.89 eV (248 nm), 4.67 eV (263 nm), 4.53 eV (275 nm), 4.32 eV (285 nm), 3.82 eV (330 nm), and 3.52 eV (350 nm), respectively. The asymmetric doublet absorption bands at 350 and 330 nm (A band), singlet absorption band at 285 nm (B band), and asymmetric triplet absorption bands at 248, 263, and 275 nm (C band) can be assigned to the spin-orbital allowed  $^1\text{S}_0 \rightarrow ^3\text{P}_1$ , vibration-induced  $^1\text{S}_0 \rightarrow ^3\text{P}_2$ , and dipole-allowed  $^1\text{S}_0 \rightarrow ^1\text{P}_1$  transitions of  $\text{Sb}^{3+}$ , respectively.



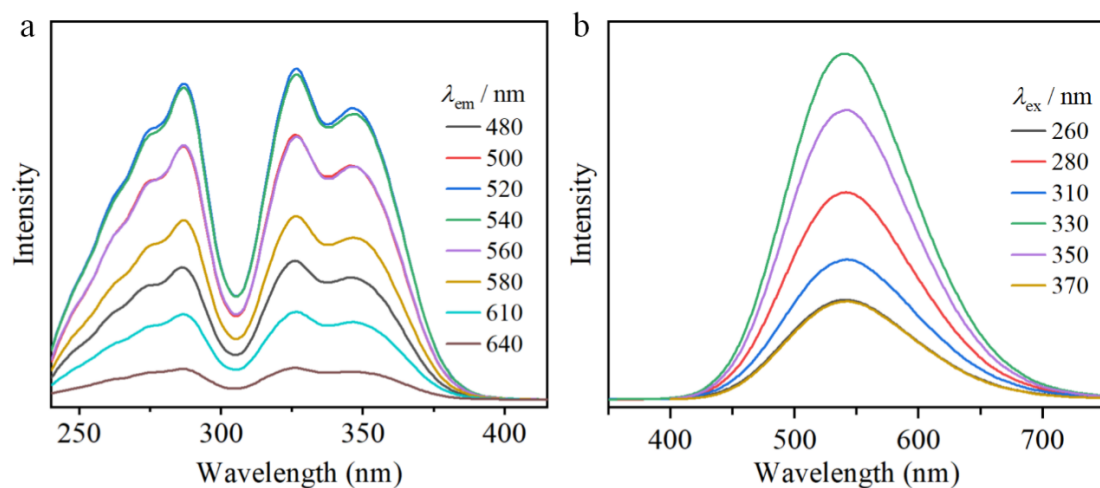

**Figure S4.** (a) PL excitation spectra of Cs<sub>3</sub>GdCl<sub>6</sub>: 1.0%Sb<sup>3+</sup> MCs by monitoring the Sb<sup>3+</sup> emission at different wavelengths. (b) PL emission spectra of Cs<sub>3</sub>GdCl<sub>6</sub>: 1.0%Sb<sup>3+</sup> MCs under excitation at different wavelengths. The excitation and emission patterns were nearly identical, confirming the single luminescent center of Sb<sup>3+</sup> in Cs<sub>3</sub>GdCl<sub>6</sub>: 1.0%Sb<sup>3+</sup> MCs.

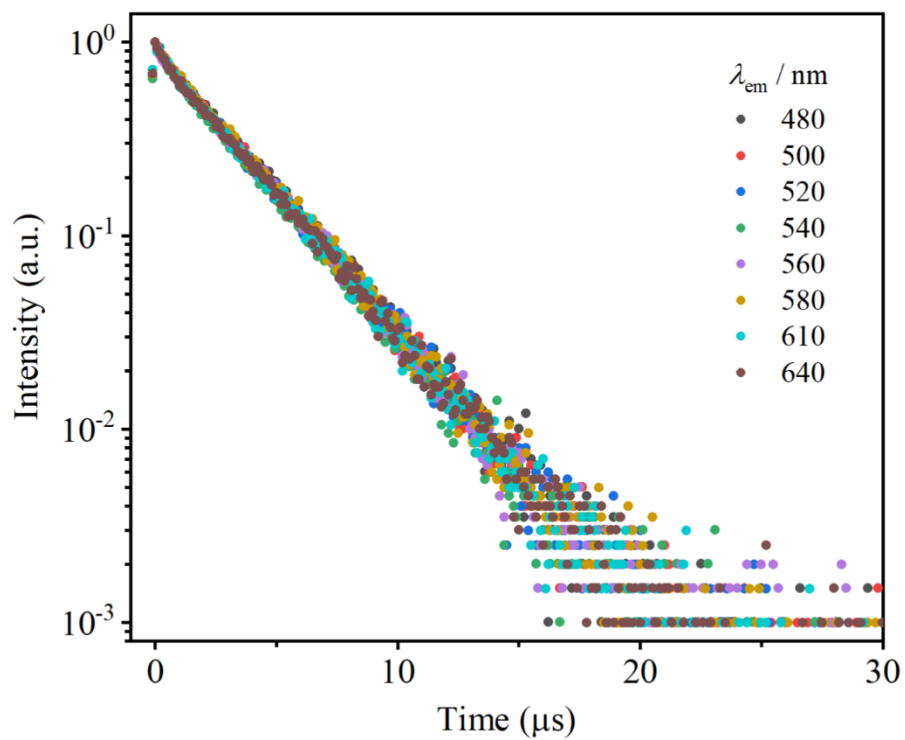

**Figure S5.** PL decay curves of  $\text{Cs}_3\text{GdCl}_6: 1.0\%\text{Sb}^{3+}$  MCs by monitoring the  $\text{Sb}^{3+}$  emission at different wavelengths under UV excitation at 330 nm.

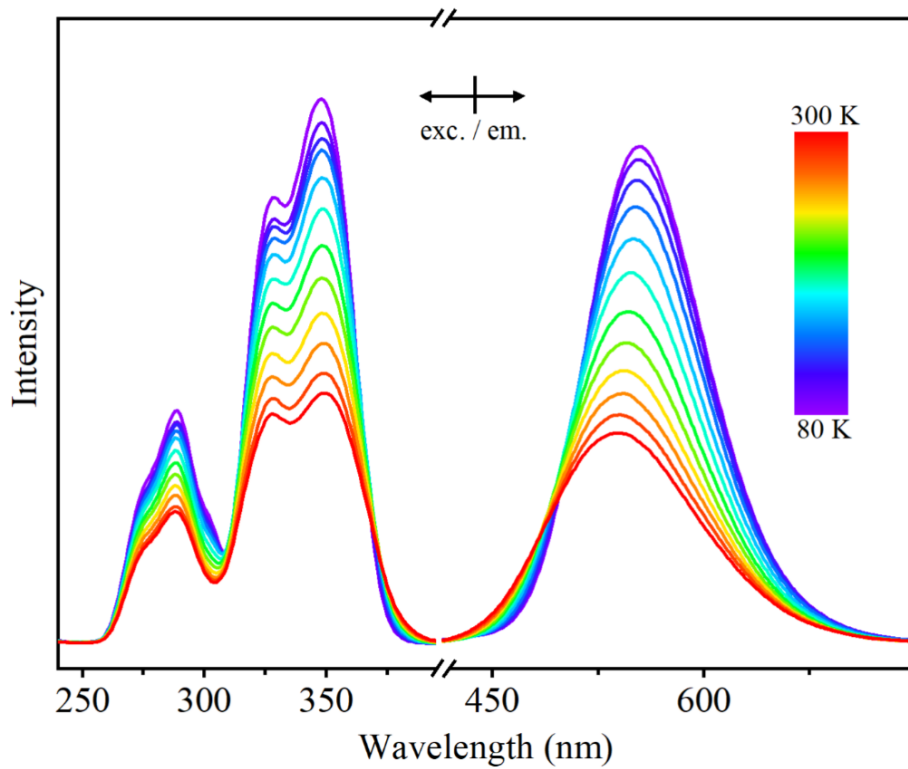

**Figure S6.** Temperature-dependent PL excitation (left,  $\lambda_{em} = 540$  nm) and emission spectra (right,  $\lambda_{ex} = 330$  nm) of  $\text{Cs}_3\text{GdCl}_6: 1.0\%\text{Sb}^{3+}$  MCs in the temperature range 80–300 K.

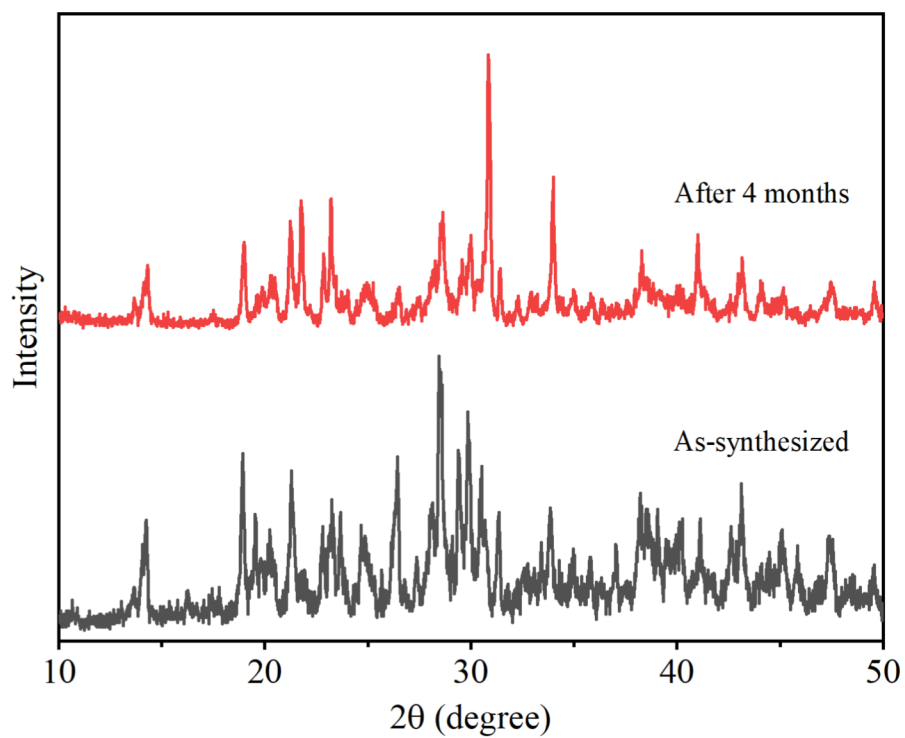

**Figure S7.** Powder XRD patterns of  $\text{Cs}_3\text{GdCl}_6: 1.0\%\text{Sb}^{3+}$  MCs before and after their storage in dry air (humidity: 30%) for 4 months. All the diffraction peaks of the MCs can be well indexed into orthorhombic  $\text{Cs}_3\text{GdCl}_6$ .

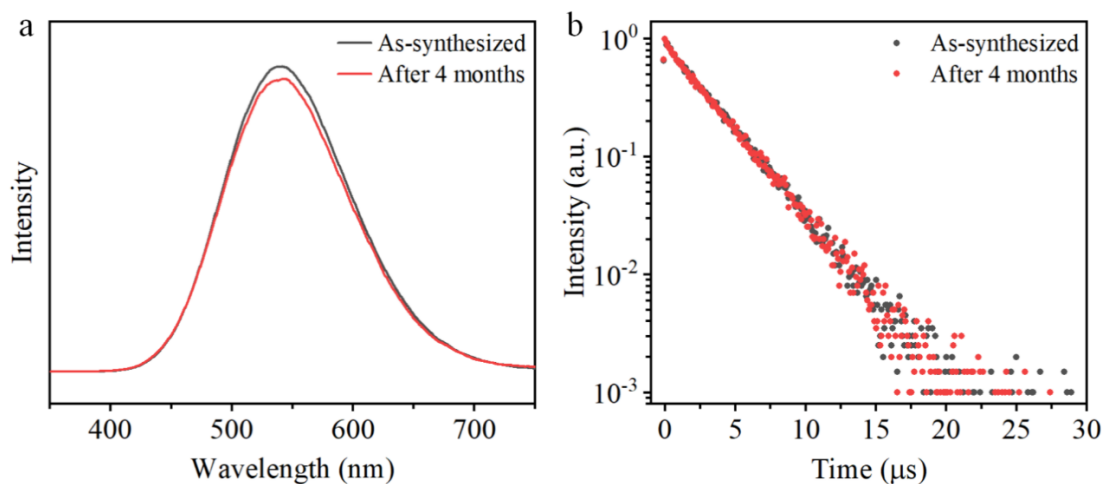

**Figure S8.** (a) PL emission spectra ( $\lambda_{\text{ex}} = 330$  nm) and (b) PL lifetime ( $\lambda_{\text{em}} = 540$  nm) of  $\text{Cs}_3\text{GdCl}_6: 1.0\%\text{Sb}^{3+}$  MCs before and after their storage in dry air (humidity: 30%) for 4 months. The PL pattern and PL lifetime of the MCs remained nearly unchanged, indicating good stability of the MCs in dry air.

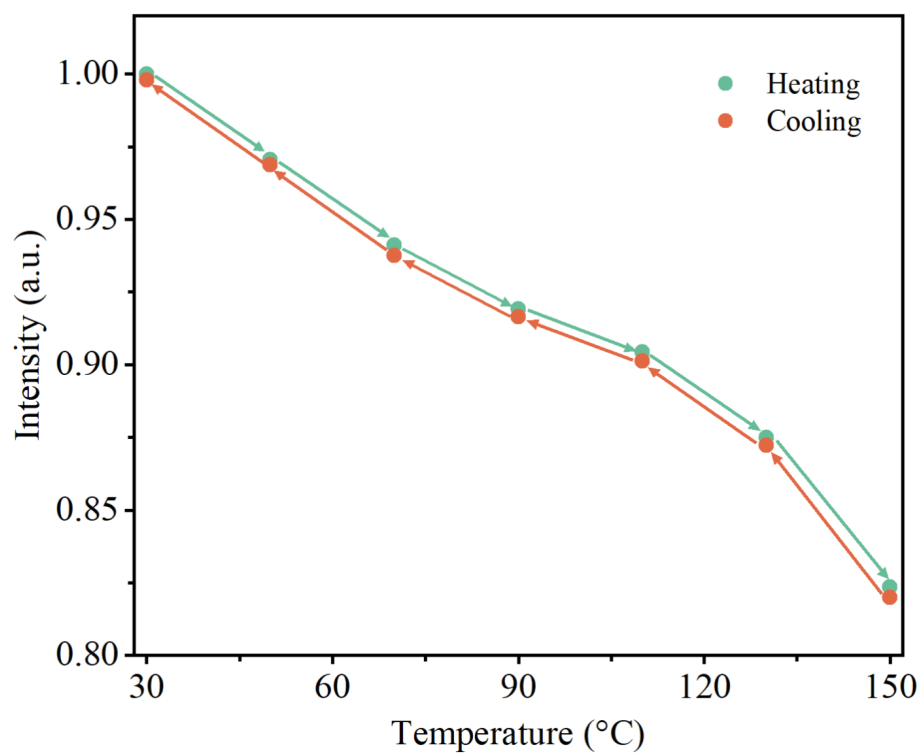

**Figure S9.** Integrated PL intensities of Cs<sub>3</sub>GdCl<sub>6</sub>: 1.0%Sb<sup>3+</sup> MCs as a function of temperature during a heating and cooling cycle between 30 and 150 °C.

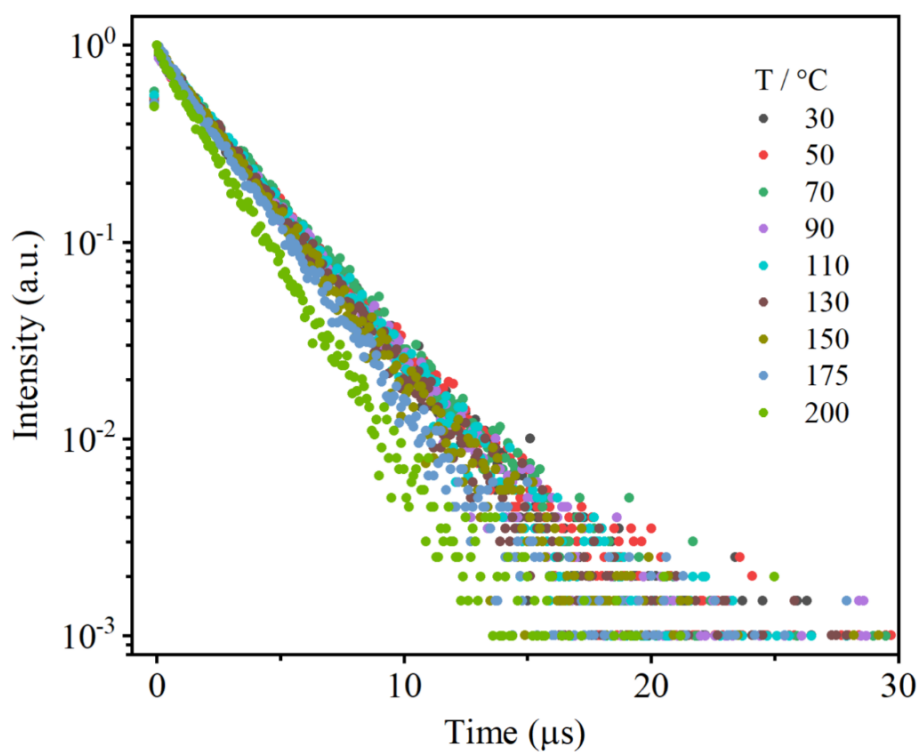

**Figure S10.** Temperature-dependent (30–200 °C) PL decay curves of  $\text{Cs}_3\text{GdCl}_6:1.0\%\text{Sb}^{3+}$  MCs by monitoring the  $\text{Sb}^{3+}$  emission at 540 nm, showing a gradual decrease in PL lifetime of  $\text{Sb}^{3+}$  from 2.36  $\mu\text{s}$  to 1.76  $\mu\text{s}$  with the temperature rise from 30 °C to 200 °C, due to the accelerated nonradiative relaxation of  $\text{Sb}^{3+}$  at higher temperatures.

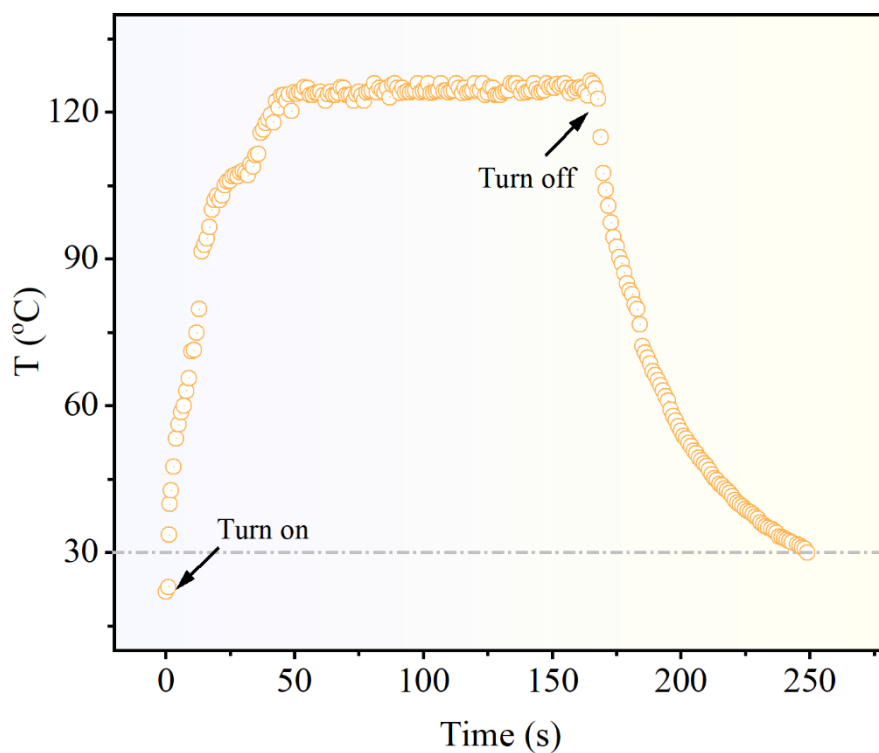

**Figure S11.** Core temperature variation of the WLED device based on  $\text{Cs}_3\text{GdCl}_6: 1.0\%\text{Sb}^{3+}$  MCs. The core temperature of the device can be reduced quickly to room temperature within 82 s after switching off the current, manifesting an outstanding thermal diffusion property of the device.
